# Supplementary material
Source: PubMed Central journal article supplement (PMC9476348)
Supplement: NIHMS1833502-supplement-Supplementary_Materials.pdf [file NIHMS1833502-supplement-Supplementary_Materials.pdf]

Supplementary Materials for  
**Gene therapy knockdown of Hippo signaling induces cardiomyocyte  
renewal in pigs after myocardial infarction**

Shijie Liu *et al.*

Corresponding author: James F. Martin, [jfmartin@bcm.edu](mailto:jfmartin@bcm.edu)

*Sci. Transl. Med.* **13**, eabd6892 (2021)  
DOI: 10.1126/scitranslmed.abd6892

**The PDF file includes:**

Figs. S1 to S11  
Tables S1 to S6  
Legends for movies S1 to S6

**Other Supplementary Material for this manuscript includes the following:**

Data file S1  
Movies S1 to S6

### **Supplementary movies S1-S6**

Echocardiograms show AAV9-GFP (P-1894) and AAV9-Sav-shRNA-injected hearts (P-2022, high-dose) at day 0 (baseline movie S1, S2), day 14 (2 weeks after myocardial infarction, movie S3, S4), and day 104 (3 months after viral injection, movie S5, S6).

**A**

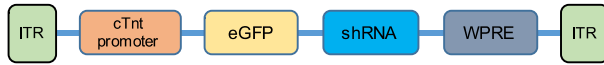

**B**

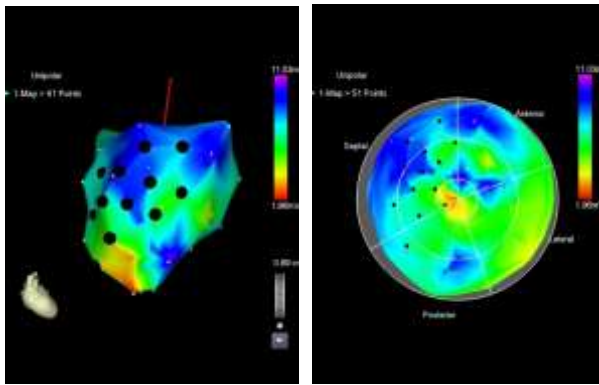

**C**

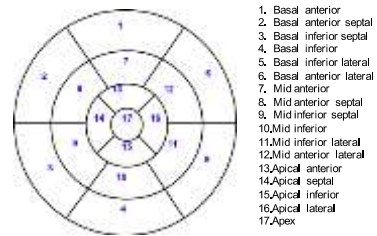

**D**

18-121 (P-1890)

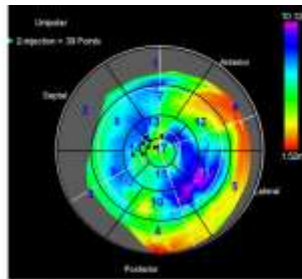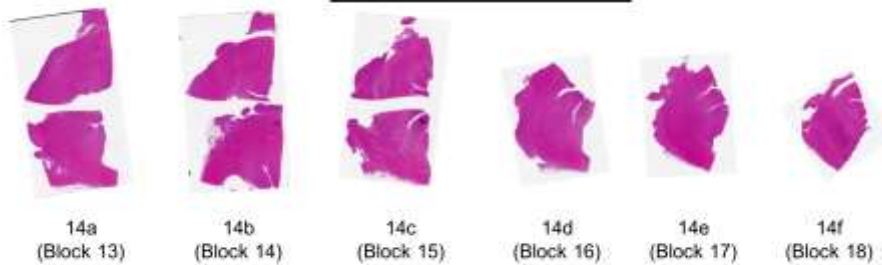

Segment 14

fa

**Fig. S1 AAV9 virus administration and pig sample processing. (A)** Schematic of the AAV9-Sav-shRNA vector. **(B)** Representative images from pig P-1922 showing the virus

injection sites (black dots) on the electromechanical mapping (EMM) system. **(C)** Annotation of heart segments. **(D)** EMM map for pig P-1890. Segments were processed for histologic analysis; based on hematoxylin and eosin staining, segments near the injection sites were selected for immunofluorescence staining.

**A**

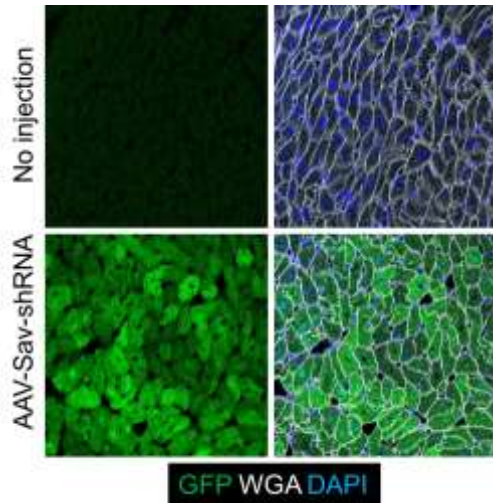

**B**

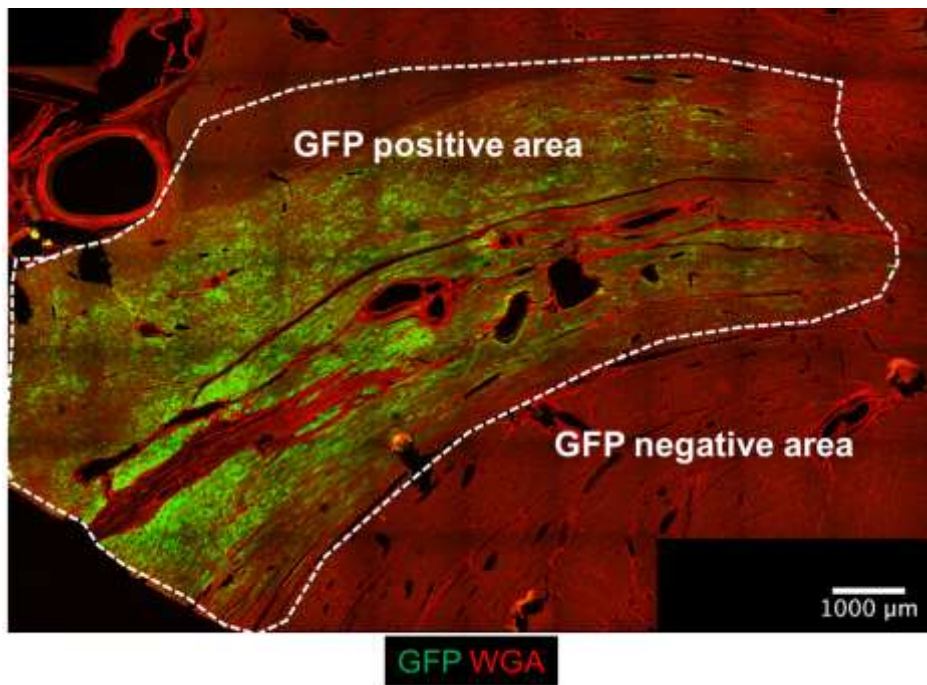

**Fig. S2 IF staining revealing GFP-positive areas. (A, B)** Three months after viral injection, sections were stained with a GFP antibody.

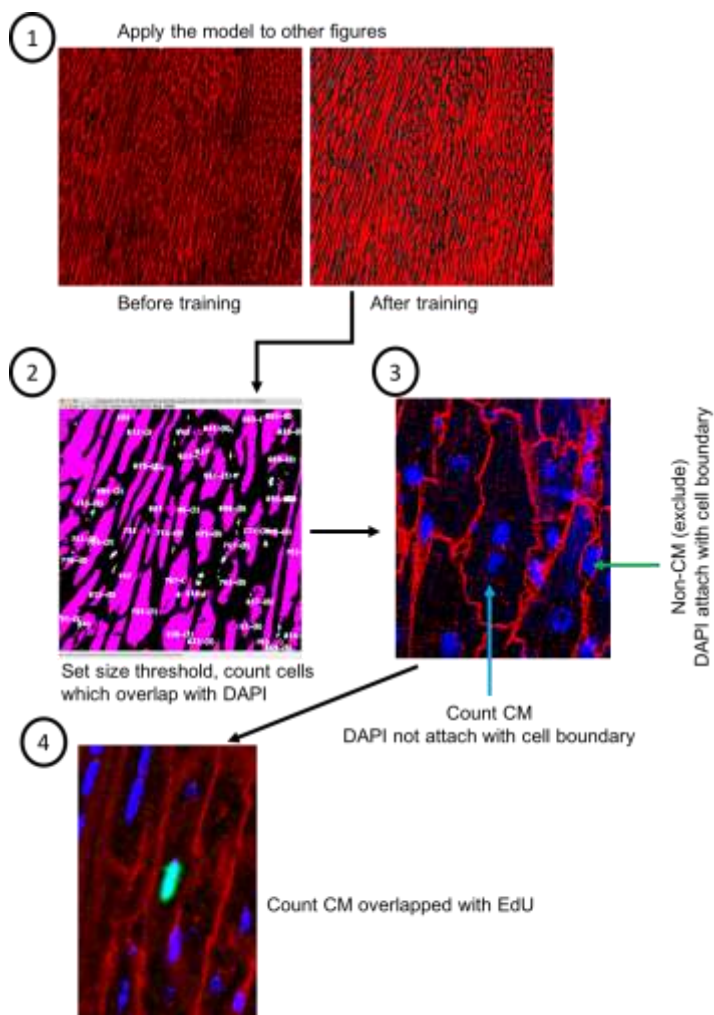

**Fig. S3 Pipeline of machine learning.** 1. The WAG channel of tiled images were analyzed by Fiji to identify the cell boundary and then used for segmentation with machine learning. 2. Segmentations were counted, and size was measured. Segmentations area greater than 100 pixels were identified as the CMs. 3. Further filters to identify CMs. Segmentations with DAPI, which were distinct from the cell boundary, were counted as the CMs. 4. EdU channel identification of the EdU positive CMs.

**A**

| P-1946 | EF  | LVEDV | LVESV | SV   |
|--------|-----|-------|-------|------|
| Day0   | 60% | 59ml  | 23ml  | 36ml |
| Day14  | 30% | 65ml  | 46ml  | 23ml |

**B**

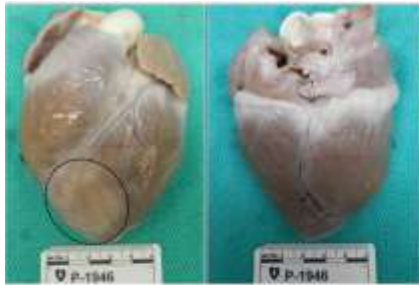

**C**

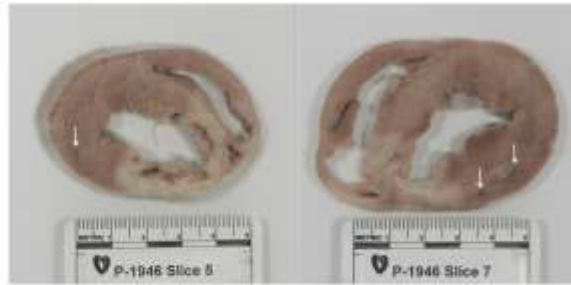

**D**

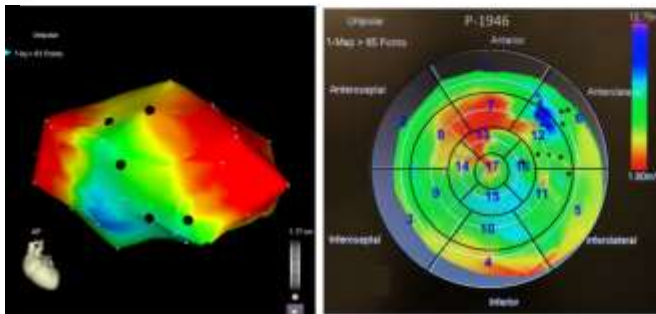

**Fig. S4 Pig model of MI.** (A) Echocardiographic results from pig P-1946 showing that heart function decreased at 14 days after MI. (B) Gross heart images show transmural scar in the anterior area near the apex. (C) Heart slices show infarct tissue. White arrows indicate focal hemorrhage suggestive of NOGA injection sites. (D) Three-dimensional (left) and two-dimensional (right) EMM maps show the injection sites. The area highlighted red at the apex is infarct tissue. The area highlighted green or blue is normal tissue. White dots indicate the probed sites for building the three-dimensional heart model. Black dots indicate virus injection sites.



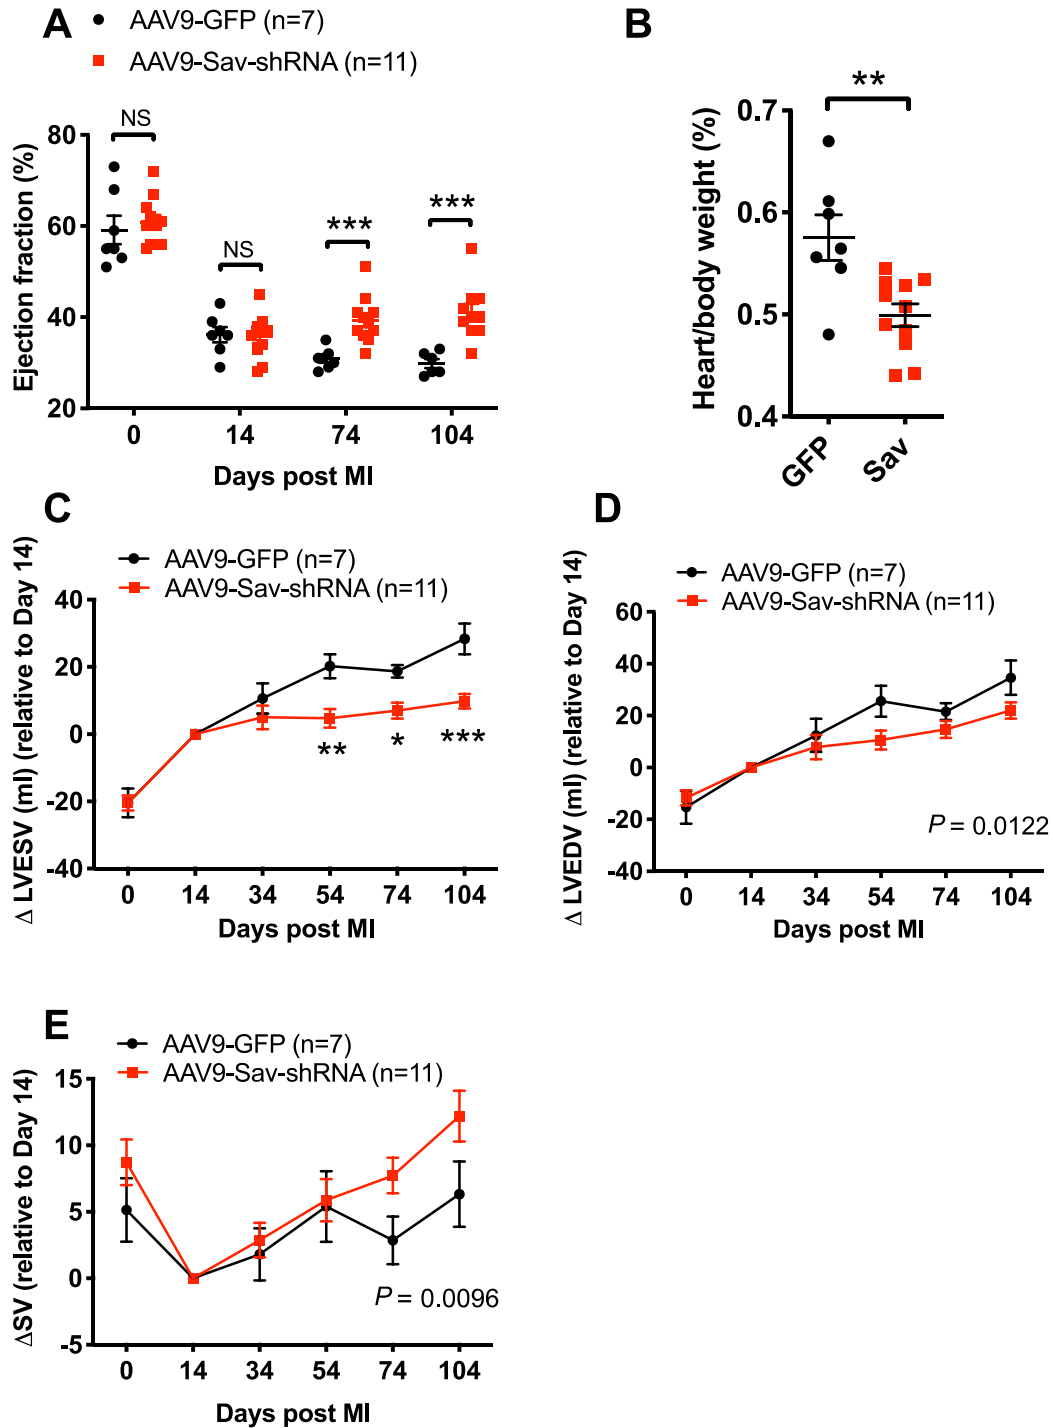

**Fig. S5 Heart regeneration in Sav knockdown pigs.** Echocardiography reveals improved contractile function in hearts injected with AAV9-Sav-shRNA than in hearts

injected with AAV9-GFP at different time points. Day 0 indicates the day of myocardial infarction, and day 14 indicates the day of virus injection. **(A)** Ejection fraction at different time points in pigs injected with AAV9-GFP (n=7) or AAV9-Sav-shRNA (n=11: 8 pigs received a regular dose, 3 pigs received a high-dose). **(B)** Heart weight/body weight for pigs at 90 days after virus injection. (GFP, AAV9-GFP, n=7; Sav, AAV9-Sav-shRNA, low and high-dose combined, n=11). **(C)** Change (relative to day 14) in left ventricular end-systolic volume (LVESV). **(D)** Change (relative to day 14) in left ventricular end-diastolic volume (LVEDV). **(E)** Changes in stroke volume at different time points. ANOVA with Bonferroni's post-hoc test was used for comparisons in **A**, **C**, **D**, and **E**. The Mann-Whitney test was used for comparisons in **B**. Data are presented as the mean±SEM. \* $P<0.05$ , \*\* $P<0.01$ , \*\*\* $P<0.001$ .

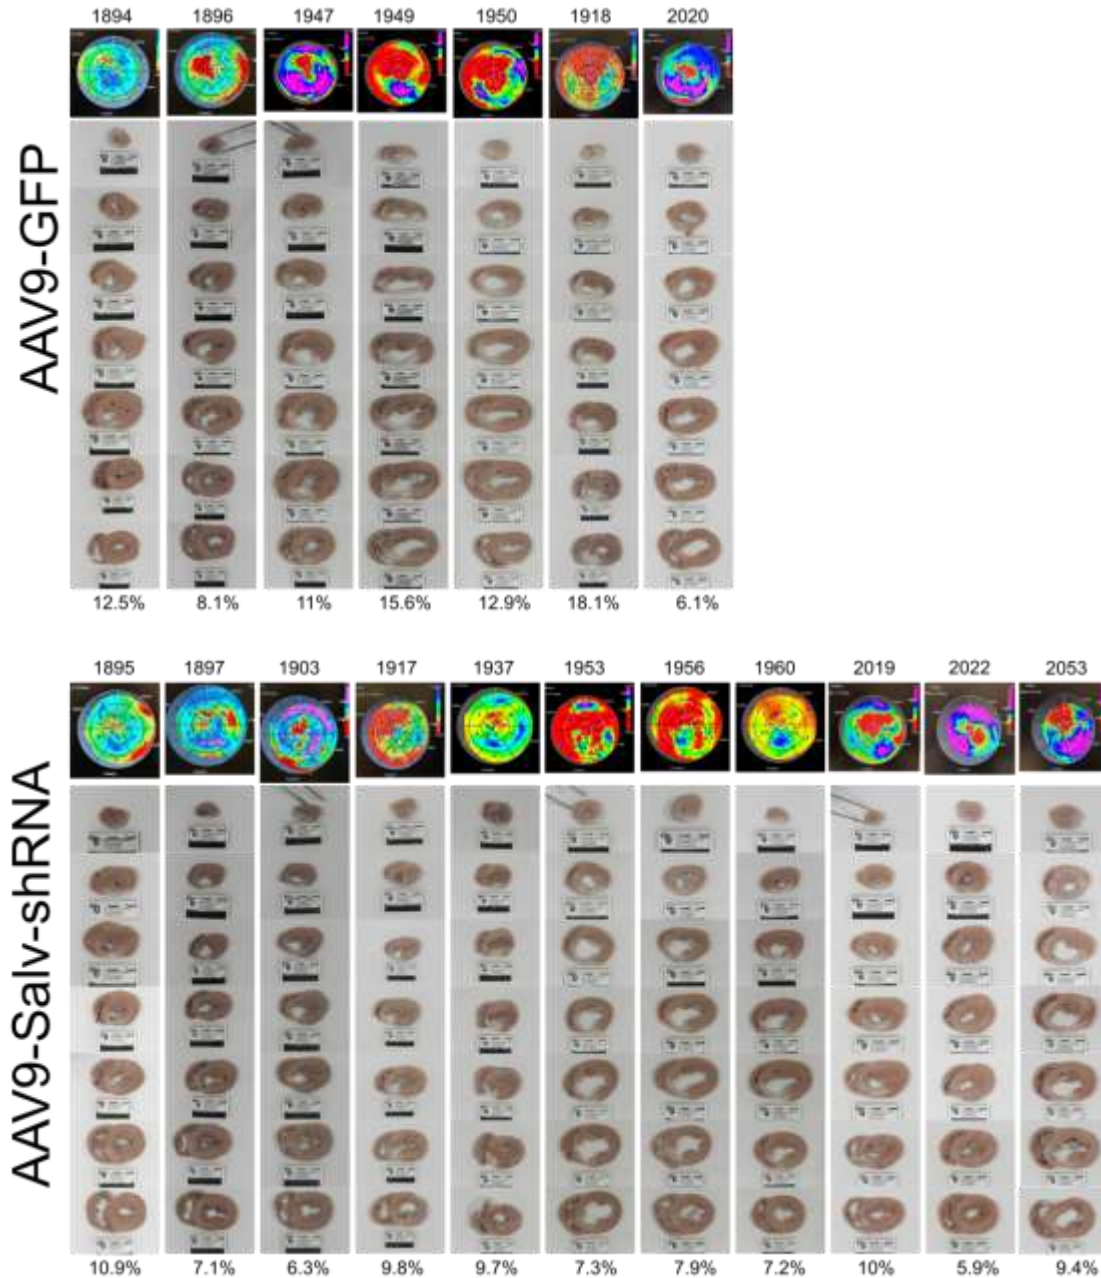

**Fig. S6 Decreased cardiac scar sizes in *Sav* knockdown pigs.** Summary of all slices from the hearts of pigs injected with AAV9-GFP (top) or AAV9-*Sav*-shRNA (bottom, low and high-dose combined). NOGA maps at the top of each column show the injection sites in each pig. Quantified scar areas are shown at the bottom of each column.

P-1918 (AAV9-GFP)

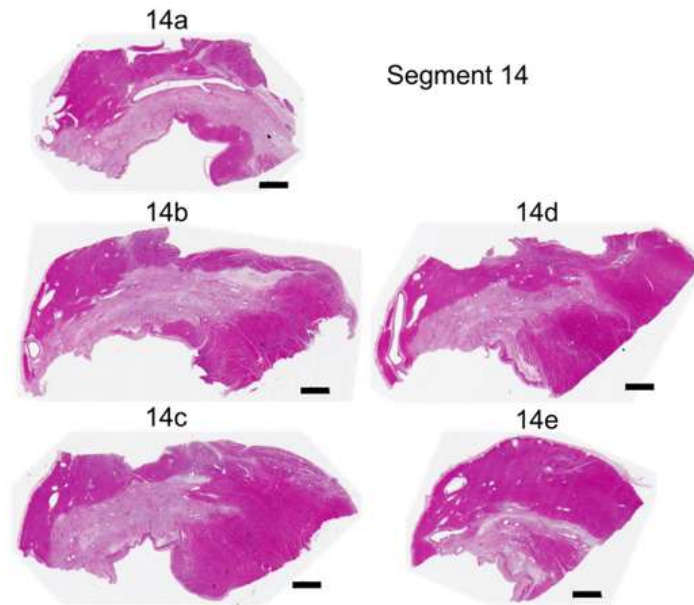

P-1917 (AAV9-Sav-shRNA)

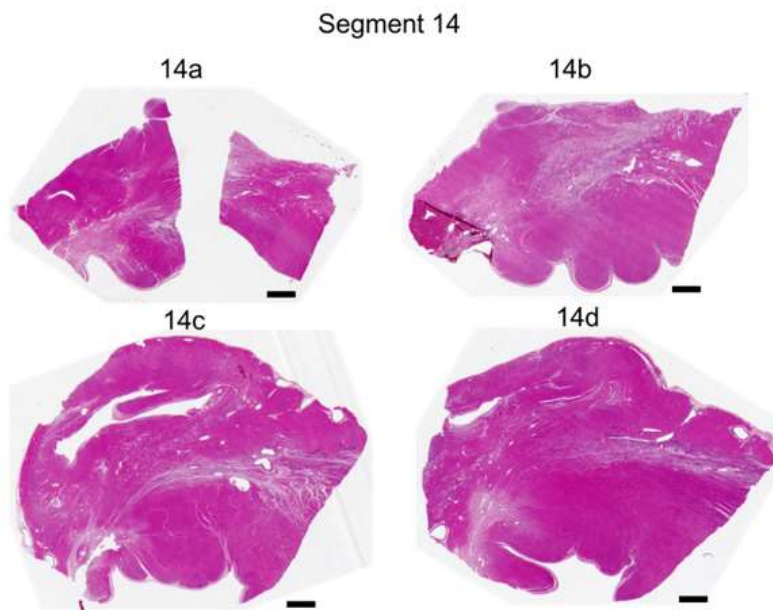

**Fig. S7 Decreased cardiac fibrosis in Sav knockdown pigs.** Hematoxylin and eosin-stained sections from pigs P-1917 (AAV9-Sav-shRNA low-dose) and P-1918 (AAV9-GFP). Sections are from similar areas in both pigs (segment 14).

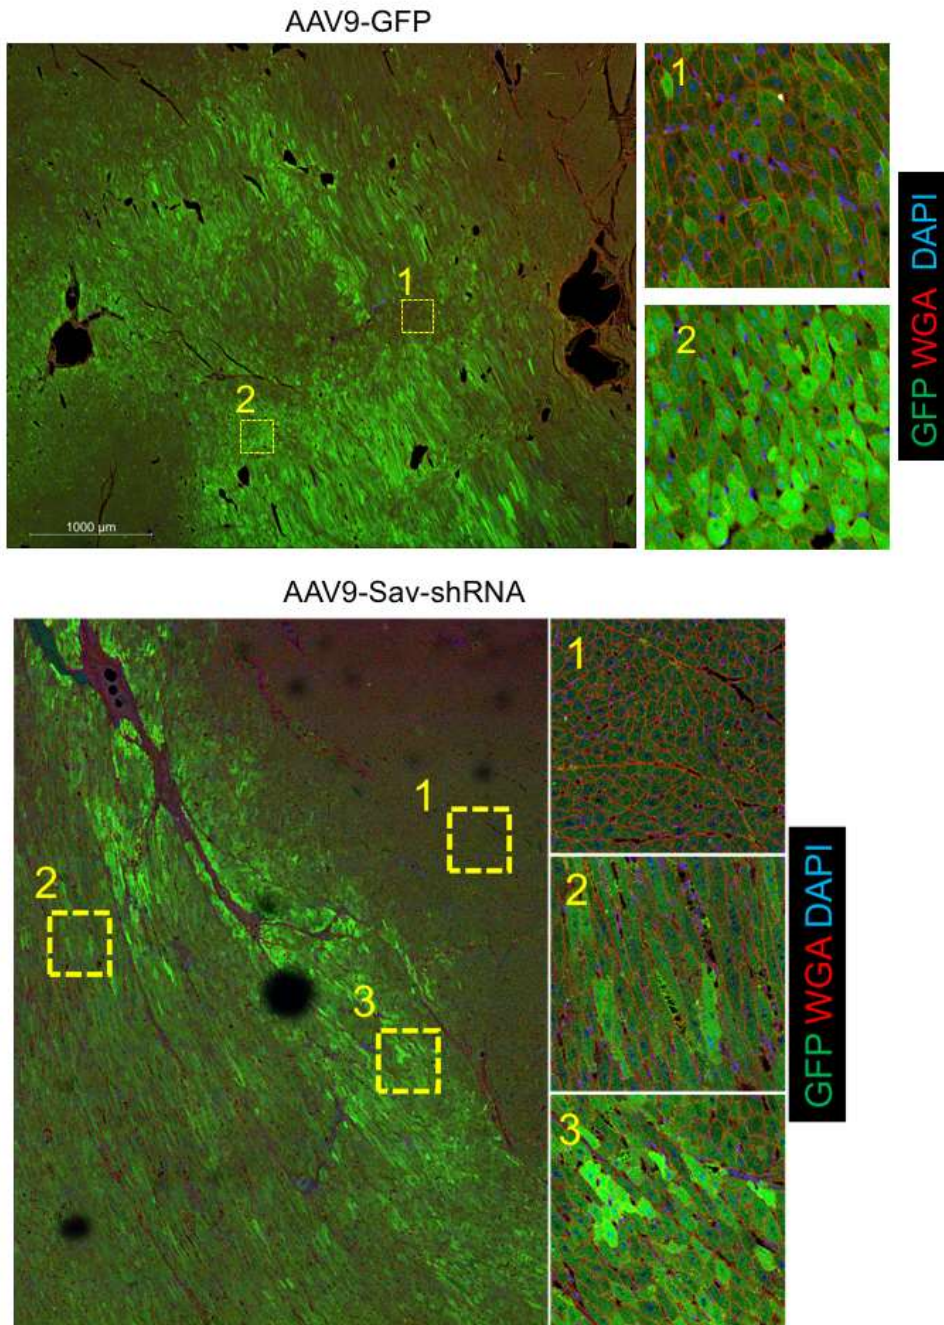

**Fig. S8 AAV9 vector expression in pig hearts.** Immunofluorescence staining showing GFP expression approximately 90 days after virus injection (AAV9-GFP, pig P-1950; AAV9-Sav-shRNA low-dose, pig P-1895).

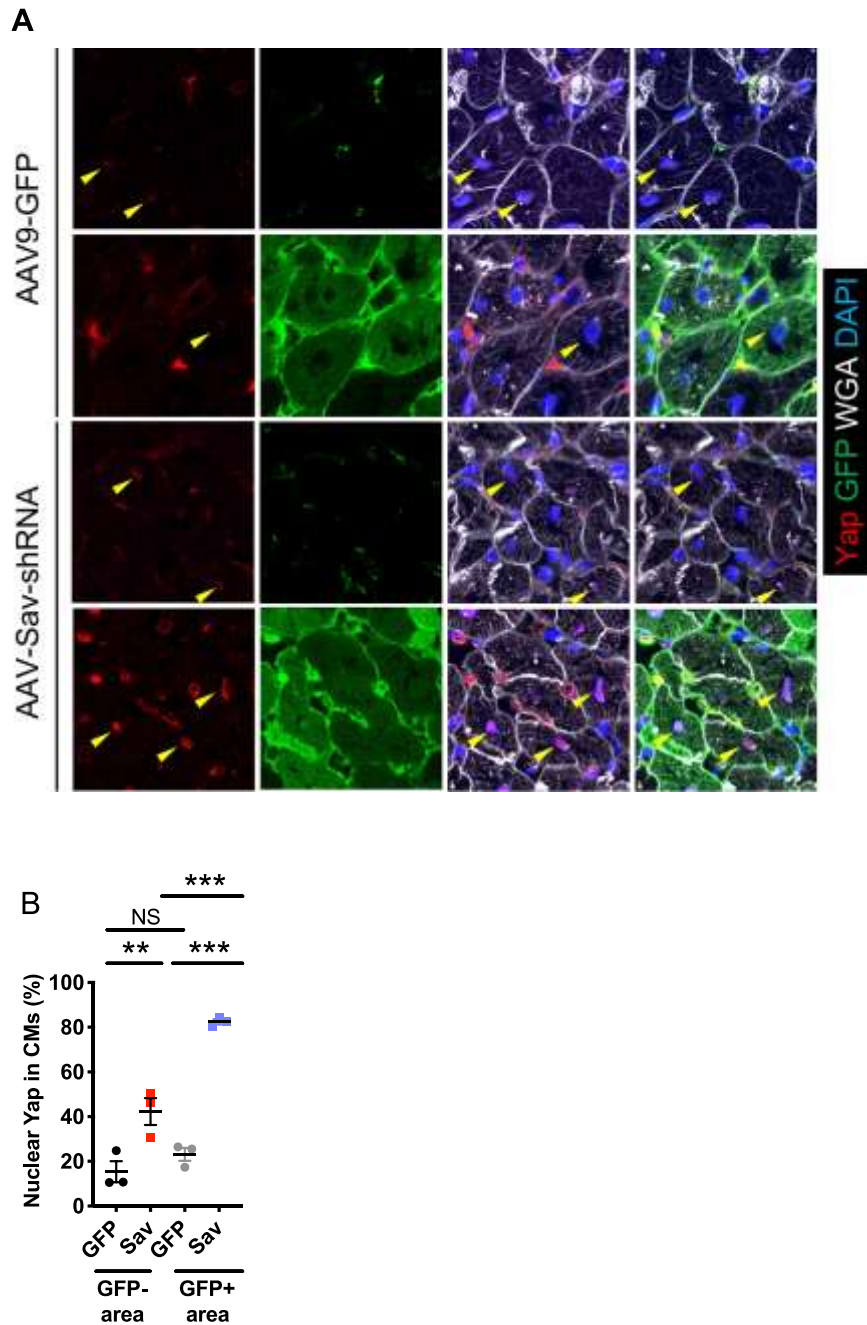

**Fig. S9 Yap staining 3 months after viral injection.** (A) Yap staining in pig hearts injected with AAV9-GFP (GFP) or AAV9-Sav-shRNA high-dose (Sav). (B) Quantification of nuclear Yap. One-way ANOVA with Tukey's post-hoc test was used for comparisons (n=3). Data are presented as the mean±SEM. \*\* $P$ <0.01, \*\*\* $P$ <0.001.

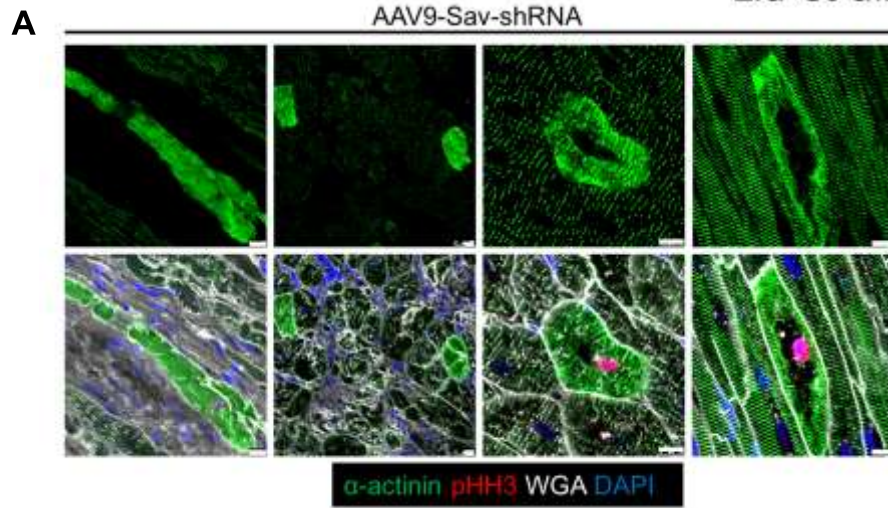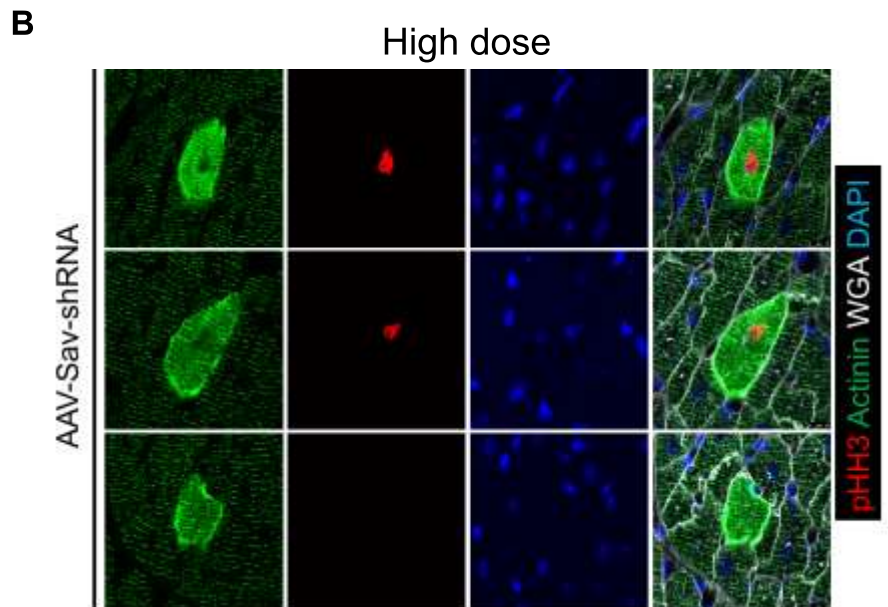

**Fig. S10 Sarcomere breakdown in Sav knockdown cardiomyocytes.** Immunofluorescence staining for pHH3 and sarcomere actinin in hearts which received low-dose (**A**) or high-dose of AAV9-Sav-shRNA (**B**).

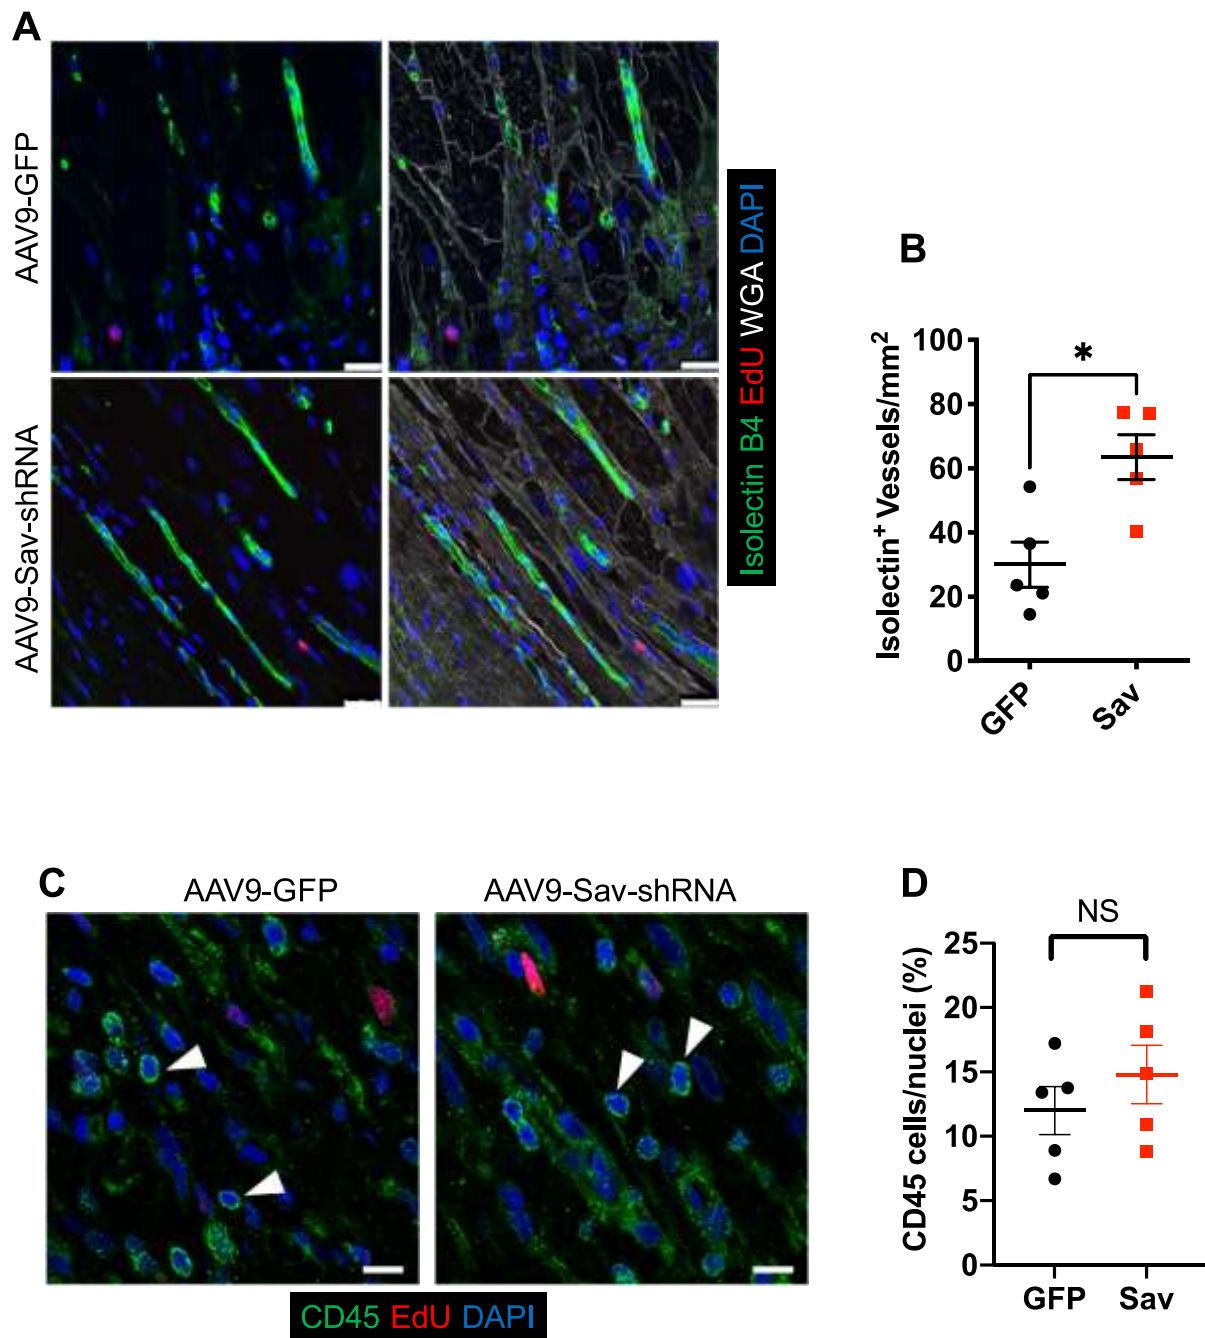

**Fig. S11 Increased vascularity in Sav knockdown pigs.** (A) Immunofluorescence staining for isolectin B4 reveals endothelial cells in the infarct tissue of pig hearts at 90 days after virus injection. Quantification of data is shown in (B). For each pig heart, 2 to



4 tile images were quantified (n=5). **(C)** Immunofluorescence staining for CD45 showing leukocytes in the infarcted tissue of pig hearts at 90 days after virus injection. Quantification of data is shown in **D**. For each pig, 5 images were quantified (n=5). GFP, AAV9-GFP; Sav, AAV9-Sav low-dose. The Mann-Whitney test was used for comparisons. Data are presented as the mean $\pm$ SEM. \* $P$ <0.05.

**Table S1. Pathology report for other organs**

| Animal ID | Lungs                                                                                       | Liver                                     | Kidneys                                                            |
|-----------|---------------------------------------------------------------------------------------------|-------------------------------------------|--------------------------------------------------------------------|
| P-1894    | Dorsal caudal dark red<br>discoloration, mild                                               | Normal                                    | Right renal hypoplasia                                             |
| P-1895    | Dorsal caudal dark red<br>discoloration, mild/moderate                                      | Normal                                    | Normal                                                             |
| P-1896    | Dorsal caudal dark red<br>discoloration, minimal                                            | Normal                                    | Normal                                                             |
| P-1897    | Small, focal reddening, minimal<br>(left caudal lobe)                                       | Normal                                    | Normal                                                             |
| P-1903    | Left lung: Dorsal caudal dark red<br>discoloration, mild; caudal lobe<br>collapse, moderate | Normal                                    | Left kidney: 1 multilocular,<br>1 unilocular cyst, cranial<br>pole |
| P-1917    | Dorsal caudal dark red<br>discoloration, minimal                                            | Normal                                    | Normal                                                             |
| P-1918    | Dorsal caudal dark red<br>discoloration, mild                                               | Normal                                    | Normal                                                             |
| P-1937    | Dorsal caudal dark red<br>discoloration, minimal                                            | Gallbladder:<br>Thin,<br>darkened<br>wall | Normal                                                             |
| P-1947    | Dorsal caudal congestion,                                                                   | Normal                                    | Right kidney: 1                                                    |

|        |                                                                                                                                                  |        |  |  |                                               |
|--------|--------------------------------------------------------------------------------------------------------------------------------------------------|--------|--|--|-----------------------------------------------|
|        | patchy, mild; multiples of reddening                                                                                                             |        |  |  | multilocular, 1 unilocular cyst, cranial pole |
| P-1949 | Dorsal caudal dark red discoloration, mild                                                                                                       | Normal |  |  | Normal                                        |
| P-1950 | Dorsal caudal dark red discoloration, mild; ventral extensive reddened areas, middle lobes                                                       | Normal |  |  | Normal                                        |
| P-1953 | Dorsal caudal dark red discoloration, mild                                                                                                       | Normal |  |  | Normal                                        |
| P-1956 | Dorsal caudal dark red discoloration, mild/moderate                                                                                              | Normal |  |  | Normal                                        |
| P-1960 | Dorsal caudal dark red discoloration, mild                                                                                                       | Normal |  |  | Normal                                        |
| P-2019 | Dorsal caudal dark red discoloration, minimal<br>Pinpoint-sized ( $\leq 1$ mm) black/brown specks, few/scattered, superficial and deeply located | Normal |  |  | Normal                                        |
| P-2020 | Dorsal caudal dark red discoloration, mild                                                                                                       | Normal |  |  | Right kidney: 2 unilocular cysts, medullary   |

|        |                                                        |        |                                              |
|--------|--------------------------------------------------------|--------|----------------------------------------------|
| P-2022 | Dorsal caudal dark red<br>discoloration, mild          | Normal | Left kidney: 1 unilocular<br>cyst, medullary |
| P-2053 | Dorsal caudal dark red<br>discoloration, mild/moderate | Normal | Normal                                       |

**Table S2. Microscopic evaluation of the lungs**

| Animal ID | Section | Description                                                                                                                                                                                                                                                                                   |
|-----------|---------|-----------------------------------------------------------------------------------------------------------------------------------------------------------------------------------------------------------------------------------------------------------------------------------------------|
| P-1937    | 1-17    | Lung (right, left, all lobes) - Areas of atelectasis, moderate, mostly in the caudal portions of the diaphragmatic lobes                                                                                                                                                                      |
| P-1947    | 9       | Lung (right middle lobe, mid) - Areas of atelectasis, moderate                                                                                                                                                                                                                                |
|           | 14      | Lung (left cranial lobe, apical, mid) - Areas of atelectasis, moderate                                                                                                                                                                                                                        |
| P-1949    | 32      | Lung (right middle lobe, mid) - Normal                                                                                                                                                                                                                                                        |
|           | 39      | Lung (left cranial lobe, caudal) - Normal                                                                                                                                                                                                                                                     |
| P-1950    | 37      | Lung (right middle lobe, cranial, mid) - Interstitial pneumonia, focal. Thickening and consolidation of alveolar septae; mild focal increase in BALT, with reactive follicles; neutrophilic presence in some areas; few clusters of multinucleated giant cells                                |
|           | 42      | Lung (left cranial lobe, cranial, mid) - Interstitial pneumonia, focal. Thickening and consolidation of alveolar septae, with chronic inflammatory cells and some areas of neutrophilic presence; focal multinucleated giant cells in some areas, sparingly with presence of foreign material |
| P-1953    | 41      | Lung (right middle lobe, mid) - Normal                                                                                                                                                                                                                                                        |
|           | 48      | Lung (left cranial lobe, caudal) - Normal                                                                                                                                                                                                                                                     |
| P-1956    | 21      | Lung (right middle lobe, mid) - Normal                                                                                                                                                                                                                                                        |
|           | 26      | Lung (left cranial lobe, cranial, mid) - Normal                                                                                                                                                                                                                                               |
| P-1960    | 21      | Lung (right middle lobe, cranial, mid) - Normal                                                                                                                                                                                                                                               |
|           | 28      | Lung (left cranial lobe, caudal) - Normal                                                                                                                                                                                                                                                     |

36

Lung (left cranial lobe, cranial, mid) - Mild lymphocytic inflammation surrounding the airways

**Table S3. Microscopic evaluation of the liver**

| <b>Animal ID</b> | <b>Section</b> | <b>Description</b>                       |
|------------------|----------------|------------------------------------------|
| P-1937           | 42             | Liver (right lateral lobe, mid) - Normal |
|                  | 45             | Liver (right medial lobe, mid) - Normal  |
|                  | 48             | Liver (left medial lobe, mid) - Normal   |
|                  | 51             | Liver (left lateral lobe, mid) - Normal  |
| P-1947           | 21             | Liver (right lateral lobe, mid) - Normal |
|                  | 24             | Liver (right medial lobe, mid) - Normal  |
|                  | 27             | Liver (left medial lobe, mid) - Normal   |
|                  | 30             | Liver (left lateral lobe, mid) - Normal  |
| P-1949           | 46             | Liver (right lateral lobe, mid) - Normal |
|                  | 49             | Liver (right medial lobe, mid) - Normal  |
|                  | 52             | Liver (left medial lobe, mid) - Normal   |
|                  | 55             | Liver (left lateral lobe, mid) - Normal  |
| P-1950           | 22             | Liver (right lateral lobe, mid) - Normal |
|                  | 25             | Liver (right medial lobe, mid) - Normal  |
|                  | 28             | Liver (left medial lobe, mid) - Normal   |
|                  | 31             | Liver (left lateral lobe, mid) - Normal  |
| P-1953           | 24             | Liver (right lateral lobe, mid) - Normal |
|                  | 27             | Liver (right medial lobe, mid) - Normal  |
|                  | 30             | Liver (left medial lobe, mid) - Normal   |
|                  | 33             | Liver (left lateral lobe, mid) - Normal  |

|        |    |                                                                                                                                                                     |
|--------|----|---------------------------------------------------------------------------------------------------------------------------------------------------------------------|
| P-1956 | 33 | Liver (right lateral lobe, mid) - Normal                                                                                                                            |
|        | 36 | Liver (right medial lobe, mid) - Normal                                                                                                                             |
|        | 39 | Liver (left medial lobe, mid) - Normal                                                                                                                              |
|        | 42 | Liver (left lateral lobe, mid) - Normal                                                                                                                             |
| P-1960 | 41 | Liver (right lateral lobe, mid) - Normal                                                                                                                            |
|        | 44 | Liver (right medial lobe, mid) - Normal                                                                                                                             |
|        | 47 | Liver (right lateral lobe, mid) - Inflammation, focal, minimal. Single focus (~ 300 $\mu$ m diameter) of chronic inflammatory cell infiltrate, not grossly apparent |
|        | 50 | Liver (left lateral lobe, mid) - Normal                                                                                                                             |



**Table S4. Overall Inflammation Grade in Injected and Non-Injected Heart sections**

| <b>Animal ID</b> | <b>Inflammation Grade</b> |                              |
|------------------|---------------------------|------------------------------|
|                  | <b>Injected Segments</b>  | <b>Non-Injected Segments</b> |
| P-1894           | Mild                      | None                         |
| P-1895           | Moderate                  | None                         |
| P-1896           | Minimal                   | None                         |
| P-1897           | Mild                      | None                         |
| P-1903           | Mild                      | None                         |
| P-1917           | Moderate                  | Minimal                      |
| P-1918           | Moderate                  | Minimal                      |
| P-1937           | None                      | None                         |
| P-1947           | None                      | None                         |
| P-1949           | Minimal                   | None                         |
| P-1950           | Minimal                   | Minimal                      |
| P-1953           | Minimal                   | None                         |
| P-1956           | None                      | None                         |
| P-1960           | Mild                      | Minimal                      |
| P-2019           | Mild                      | None                         |
| P-2020           | Mild                      | None                         |
| P-2022           | None                      | None                         |
| P-2053           | Moderate                  | None                         |

**Table S5. Incidence of inflammation by NOGA sections**

| Animal ID | Injected Segments |              |                   | Non-Injected Segments |                   | NOGA Injection Pattern |
|-----------|-------------------|--------------|-------------------|-----------------------|-------------------|------------------------|
|           | NOGA Segment      | # Injections | Affected Sections | NOGA Segment          | Affected Sections |                        |
| P-1894    | 7                 | 1            | 1/4               | 5                     | 0/1               | Dispersed              |
|           | 8                 | 2            | 1/4               |                       |                   |                        |
| P-1895    | 13                | 2            | 1/6               | 5                     | 0/1               | Dispersed              |
|           | 14                | 2            | 5/5               |                       |                   |                        |
| P-1896    | 15                | 1            | 2/6               | 5                     | 0/1               | Dispersed              |
|           | 16                | 1            | 1/6               |                       |                   |                        |
|           | 7                 | 1            | 0/5               |                       |                   |                        |
| P-1897    | 14                | 1            | 0/5               | 5                     | 0/1               | Dispersed              |
|           | 15                | 2            | 1/4               |                       |                   |                        |
|           | 8                 | 2            | 2/5               |                       |                   |                        |
| P-1903    | 7                 | 2            | 0/4               | 5                     | 0/1               | Dispersed              |
|           | 8                 | 2            | 1/4               |                       |                   |                        |
|           | 14                | 2            | 3/5               |                       |                   |                        |
| P-1917    | 17                | 1            | 2/2               | 2                     | 0/1               | Dispersed              |
|           | 14                | 3            | 4/4               | 3                     | 1/1               |                        |
|           | 9                 | 4            | 5/5               | 13                    | 0/1               |                        |
| P-1918    | 14                | 2            | 4/5               | 5                     | 1/1               | Dispersed              |
|           | 6                 | 4            | 5/6               | 4                     | 1/1               |                        |

|        |    |     |     |    |     |           |
|--------|----|-----|-----|----|-----|-----------|
|        |    |     |     | 13 | 1/1 |           |
| P-1937 | 17 | 3   | 0/4 | 13 | 0/1 | Clustered |
|        | 14 | 4   | 0/5 | 6  | 0/1 |           |
|        | 15 | 2   | 0/5 | 5  | 0/1 |           |
| P-1947 | 16 | 3   | 0/4 | 13 | 0/1 | Clustered |
|        | 12 | 2.5 | 0/5 | 10 | 0/1 |           |
|        | 6  | 2   | 0/2 | 3  | 0/1 |           |
| P-1949 | 15 | 2.5 | 0/5 | 13 | 0/1 | Clustered |
|        | 9  | 2   | 1/4 | 3  | 0/1 |           |
|        | 4  | 4   | 0/4 | 6  | 0/1 |           |
| P-1950 | 12 | 4.5 | 0/6 | 4  | 1/1 | Clustered |
|        | 9  | 5   | 2/5 | 5  | 0/1 |           |
|        |    |     |     | 13 | 0/1 |           |
| P-1953 | 4  | 2   | 1/2 | 6  | 0/1 | Clustered |
|        | 15 | 2   | 1/3 | 3  | 0/1 |           |
|        | 10 | 6   | 3/8 | 7  | 0/1 |           |
| P-1956 | 16 | 1.5 | 1/6 | 13 | 0/1 | Clustered |
|        | 11 | 6   | 0/4 | 6  | 0/1 |           |
|        | 5  | 3   | 0/2 | 4  | 0/1 |           |
|        | 7  | 2   | 0/2 |    |     |           |
| P-1960 | 5  | 2   | 3/3 | 1  | 1/1 | Clustered |
|        | 11 | 3   | 3/6 | 4  | 1/1 |           |

|        |    |   |     |    |     |           |
|--------|----|---|-----|----|-----|-----------|
|        | 9  | 4 | 3/5 | 13 | 1/1 |           |
| P-2019 | 16 | 2 | 3/3 | 6  | 0/1 | Clustered |
|        | 14 | 2 | 2/3 | 13 | 0/1 |           |
|        | 12 | 2 | 0/3 |    |     |           |
| P-2020 | 16 | 1 | 2/2 | 4  | 0/1 | Clustered |
|        | 13 | 1 | 0/1 |    |     |           |
|        | 12 | 3 | 2/4 |    |     |           |
|        | 8  | 3 | 0/4 |    |     |           |
| P-2022 | 6  | 3 | 0/3 | 4  | 0/1 | Clustered |
|        | 12 | 4 | 0/2 | 3  | 0/1 |           |
|        | 7  | 1 | 0/2 |    |     |           |
|        | 13 | 3 | 0/1 |    |     |           |
|        | 14 | 2 | 0/2 |    |     |           |
| P-2053 | 14 | 2 | 4/4 | 1  | 0/1 | Clustered |
|        | 15 | 2 | 4/4 | 13 | 0/1 |           |
|        | 16 | 1 | 1/4 | 7  | 0/1 |           |
|        | 11 | 4 | 4/4 |    |     |           |
|        | 9  | 5 | 5/5 |    |     |           |

**Table S6. Body weight for pigs**

**Body weights**

| <b>Viral injection</b> | <b>ID number</b> | <b>before-MI</b> | <b>2 weeks after MI</b> | <b>10 days after virus</b> | <b>20 days after virus</b> | <b>30 days after virus</b> | <b>40 days after virus</b> | <b>50 days after virus</b> | <b>60 days after virus</b> | <b>80 days after virus</b> | <b>90 days after virus</b> |
|------------------------|------------------|------------------|-------------------------|----------------------------|----------------------------|----------------------------|----------------------------|----------------------------|----------------------------|----------------------------|----------------------------|
| <b>AAV9-GFP</b>        | <b>P-1894</b>    | 33.11            | 36.6                    | 40.7                       | 43.9                       | 43.6                       | 47                         | 48.2                       | 45.81                      |                            |                            |
|                        | <b>P-1896</b>    | 26.3             | 31.8                    | 35.2                       | 35.5                       | 38                         | 39                         | 40.5                       | 42.7                       | 43.09                      | 45.81                      |
|                        | <b>P-1918</b>    | 28.57            | 33                      | 33.2                       | 33.9                       | 36.4                       | 38.6                       | 41.27                      | 42.63                      | 47.4                       | 50.12                      |
|                        | <b>P-1947</b>    | 23.1             | 28                      | 31.4                       | 30.9                       | 34.5                       | 35.7                       | 36.1                       | 37.3                       | 38.1                       | 40.3                       |
|                        | <b>P-1949</b>    | 26.76            | 31.8                    | 34.1                       | 35.5                       | 38.6                       | 38.6                       | 39.91                      | 40.82                      | 43.99                      | 45.8                       |
|                        | <b>P-1950</b>    | 26.76            | 30.8                    | 32                         | 33.2                       | 33.9                       | 34.01                      | 34.1                       | 35.15                      | 35.38                      | 37.19                      |
|                        | <b>P-2020</b>    | 28.6             | 29.5                    | 30.9                       | 33.2                       | 37                         | 39                         | 40                         | 40.2                       | 47.7                       | 49.5                       |
|                        |                  |                  |                         |                            |                            |                            |                            |                            |                            |                            |                            |
| <b>AAV9-Sav-shRNA</b>  | <b>P-1895</b>    | 34.01            | 38.6                    | 41.4                       | 44.5                       | 46.1                       | 44.3                       | 44.8                       | 46.8                       |                            |                            |
|                        | <b>P-1897</b>    | 29.02            | 34.8                    | 38.2                       | 38                         | 41.4                       | 42.3                       | 43                         | 44.8                       | 45.81                      | 49.21                      |
|                        | <b>P-1903</b>    | 25.4             | 28.6                    | 32.5                       | 32.7                       | 33.9                       | 35.5                       | 36.1                       | 37                         | 40                         | 42.86                      |
|                        | <b>P-1917</b>    | 30.39            | 34.5                    | 36.8                       | 40.5                       | 37.7                       | 41.3                       | 42                         | 43.54                      | 46.72                      | 48.98                      |
|                        | <b>P-1937</b>    | 26.76            | 31.8                    | 33.6                       | 38                         | 38.4                       | 37                         | 40.5                       | 40                         | 43.5                       | 43.54                      |
|                        | <b>P-1953</b>    | 25.85            | 30                      | 30.5                       | 30.7                       | 34.3                       | 36.4                       | 34.92                      | 37.42                      | 37.19                      | 38.55                      |
|                        | <b>P-1956</b>    | 26.7             | 31.4                    | 34.1                       | 35.9                       | 35.9                       | 36.8                       | 37.5                       | 40                         | 40.8                       | 43                         |
|                        | <b>P-1960</b>    | 24.04            | 28.2                    | 28.2                       | 29.3                       | 30.7                       | 31.4                       | 33.11                      | 33.11                      | 37.64                      | 38.55                      |
|                        | <b>P-2019</b>    | 38.6             | 38.6                    | 39.5                       | 41.6                       | 43.6                       | 44.1                       | 44.1                       | 43.9                       | 49.5                       | 53                         |

|  |               |      |      |      |      |      |    |      |      |      |      |
|--|---------------|------|------|------|------|------|----|------|------|------|------|
|  | <b>P-2022</b> | 30.5 | 31   | 35.9 | 37.3 | 38.2 | 39 | 39.5 | 41.6 | 46.8 | 52.3 |
|  | <b>P-2053</b> | 34   | 36   | 38   | 40   | 42.7 | 46 | 49.1 | 52   | 61   | 64   |
|  | <b>P-2066</b> | 33   | 36   | 38   | 40   | 45   |    |      |      |      |      |
|  | <b>P-2067</b> | 35   | 37.7 | 41   | 41   | 41   |    |      |      |      |      |
|  | <b>P-2069</b> | 26   | 26.5 | 27.5 | 29   | 30   |    |      |      |      |      |
|  | <b>P-2070</b> | 26   | 27   | 27   | 29   | 30   |    |      |      |      |      |
|  | <b>P-2071</b> | 27   | 27.5 | 27.5 | 30   | 31   |    |      |      |      |      |
|  | <b>P-2073</b> | 25   | 27   | 27.5 | 27.7 | 29   |    |      |      |      |      |
|  | <b>P-2075</b> | 28   | 29.5 | 30   | 32   | 32   |    |      |      |      |      |
